# Supplementary material for: An ultrasensitive cathodic electrochemiluminescence immunoassay for thrombomodulin based on Ru(bpy)32+ encapsulated by MIL-NH2-101(Al) nanocomposites
Source: Royal Society of Chemistry journal article supplement (doi:10.1039/d2tb01076c), 2022-01-01
Supplement: d2tb01076c1.pdf [file d2tb01076c1.pdf]

Supporting Information

**An ultrasensitive cathodic electrochemiluminescence immunoassay for thrombomodulin based on Ru(bpy)<sub>3</sub><sup>2+</sup> encapsulated MIL-NH<sub>2</sub>-101(Al) nanocomposites**

Shuang He<sup>a, c, 1</sup>, Qiaoling Liu<sup>b, 1</sup>, Yu Ji<sup>c, 1</sup>, Pei Zhang<sup>c</sup>, Chusen Huang<sup>c</sup>, Jing Sun<sup>c</sup>, Yao Lu<sup>c</sup>, Da-Peng Yang<sup>a, b, \*</sup>, Nengqin Jia<sup>a, c, \*</sup>

<sup>a</sup>College of Chemical Engineering and Materials Science, Quanzhou Normal University, Quanzhou 362000, Fujian Province, PR China

<sup>b</sup>Department of Clinical Laboratory, the Second Affiliated Hospital of Fujian Medical University, Quanzhou 362400, Fujian Province, PR China

<sup>c</sup>College of Chemistry and Materials Science, Shanghai Normal University, Shanghai 200234, China.

\*Corresponding authors

E-mail: [yangdp@qztc.edu.cn](mailto:yangdp@qztc.edu.cn) (D.-P. Yang); [nqjia@shnu.edu.cn](mailto:nqjia@shnu.edu.cn) (N.Q. Jia)

<sup>1</sup> These authors contributed equally to this manuscript.

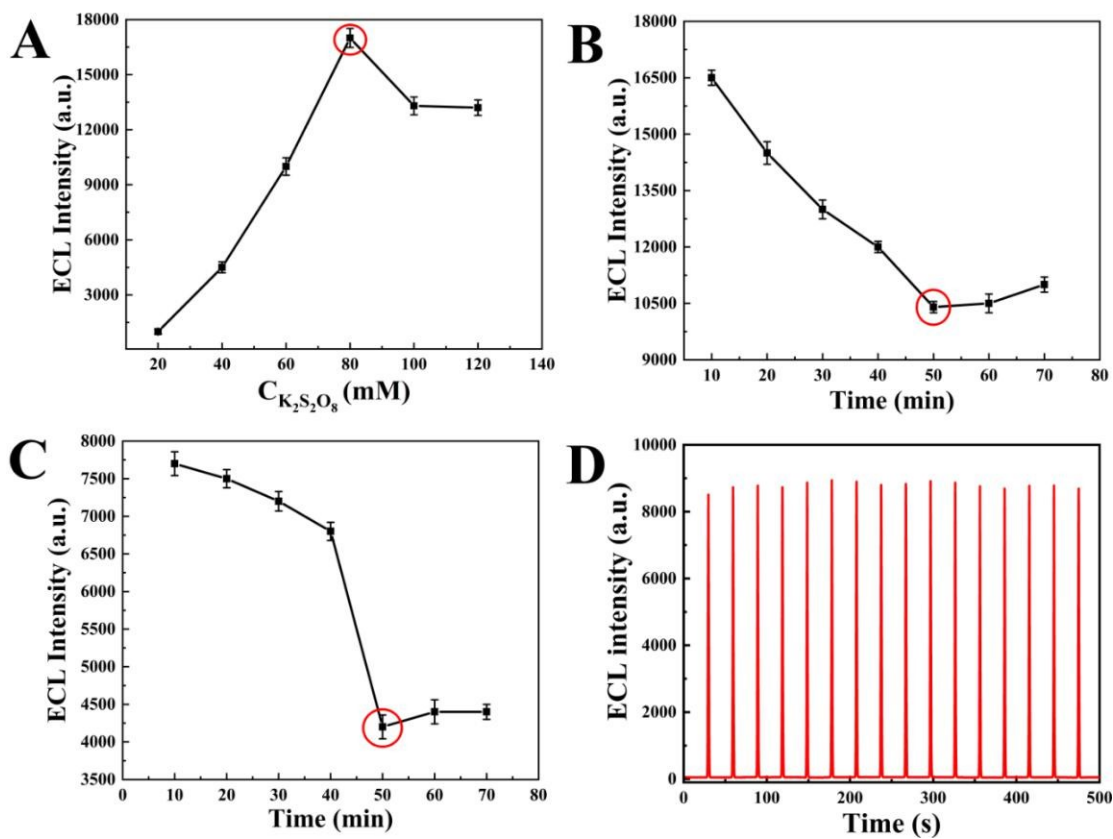

**Figure S1.** Optimization of Experimental conditions. (A) Concentration of K<sub>2</sub>S<sub>2</sub>O<sub>8</sub>; (B) Incubation time of Ab-TM; (C) Incubation time of TM; (D) Stability of the proposed Ru(bpy)<sub>3</sub><sup>2+</sup>@MIL-NH<sub>2</sub>-101(AI) ECL immunosensor under optimal conditions.

Table S1 Comparison of the proposed ECL sensing with other reported methods for the detection of TM

| Methods                                          | Linear Range<br>( $\mu\text{g/mL}$ )    | Detection Limit<br>( $\mu\text{g/mL}$ ) | Reusability | Ref.       |
|--------------------------------------------------|-----------------------------------------|-----------------------------------------|-------------|------------|
| Quartz Crystal Microbalance<br>(QCM)             | $1 \times 10^{-2}$ - 5                  | $2 \times 10^{-3}$                      | No          | Luo et al  |
| Fluorescence Resonance<br>Energy Transfer (FRET) | $1 \times 10^{-7}$ - $5 \times 10^{-3}$ | $1.2 \times 10^{-8}$                    | No          | Kong et al |
| Electrochemistry (EC)                            | $1 \times 10^{-3}$ - $2 \times 10^{-2}$ | $3.15 \times 10^{-5}$                   | Yes         | Yang et al |
| Electrochemiluminescence<br>(ECL)                | $1 \times 10^{-5}$ - 10                 | $8.2 \times 10^{-6}$                    | Yes         | This work  |

Table S2 Recoveries test of TM in human serum

| Sample | Added ( $\mu\text{g/mL}$ ) | Found ( $\mu\text{g/mL}$ ) | R.S.D (%) | Recovery (%) |
|--------|----------------------------|----------------------------|-----------|--------------|
| Serum  | 1                          | 1.0002                     | 1.26      | 100.02       |
|        | 0.1                        | 0.09939                    | 1.34      | 99.39        |
|        | 0.01                       | 0.01019                    | 0.99      | 101.9        |
|        | $1 \times 10^{-3}$         | $9.92 \times 10^{-4}$      | 1.30      | 99.2         |
|        | $1 \times 10^{-4}$         | $1.029 \times 10^{-4}$     | 1.88      | 102.9        |

References:

Y. Q. Luo, T. Liu, J. M. Zhu, L. Y. Kong, W. Wang, L. Tan, *Anal Chem*, 2015, 87: 11277-11284.

L.Y. Kong, J. M. Zhu, W. Wang, L. H. Jin, Y.J. Fu, B.H. Duan, L. Tan. *Spectrochimica Acta Part A: Molecular and Biomolecular Spectroscopy*, 2016, 173 : 675 - 680.

Y.C. Yang , S.W. Dong , T. Shen , C. X. Jian , H.J. Chang ,Y. Li , F.T. He, J.X.Zhou. *Anal. Lett.*, 2012, 45:7, 724-734.
